# Supplementary material for: Fast Assembly of Metal Organic Framework UiO-66 in Acid-Base Tunable Deep Eutectic Solvent for the Acetalization of Benzaldehyde and Methanol
Source: MDPI journal article supplement (doi:10.3390/molecules27217246), 2022-10-25
Supplement: s1 [file s1]

## **Supporting Information**

### **Fast Assembly of Metal Organic Framework UiO-66 in Acid-Base Tunable Deep Eutectic Solvent for the Acetalization of Benzaldehyde and Methanol**

Lifang Chen \*, Xiangzhu Ye, Ting Zhang, Hao Qin, Hongye Cheng and Zhiwen Qi \*

State Key Laboratory of Chemical Engineering, School of Chemical Engineering,  
East China University of Science and Technology, Shanghai, 200237, P.R. China.

\*E-mail: lchen@ecust.edu.cn; zwqi@ecust.edu.cn

**Table S1.** pH for the aqueous solutions (0.01 mol/L) of MIm-PTSA mixtures with different molar ratios (20 °C) and corresponding melting point.

| entry | MIm:pTSA | pH    | melting point (°C) |
|-------|----------|-------|--------------------|
| 1     | 1:0      | 10.13 | 142-143            |
| 2     | 3:1      | 7.41  | 39                 |
| 3     | 4:3      | 6.91  | 9                  |
| 4     | 1:2      | 1.82  | 16                 |
| 5     | 0:1      | 1.32  | 103                |

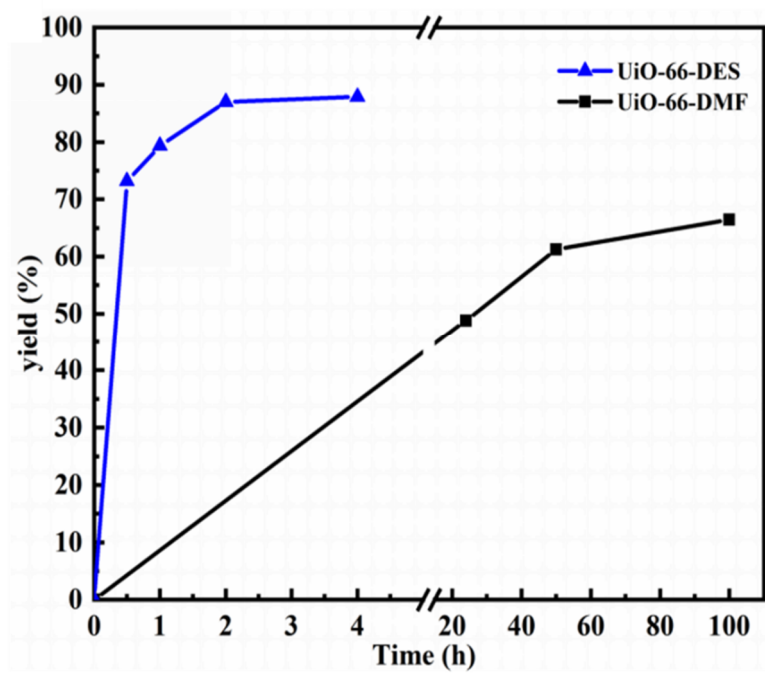

**Figure S1.** Formation rate of UiO-66 in DES and DMF.

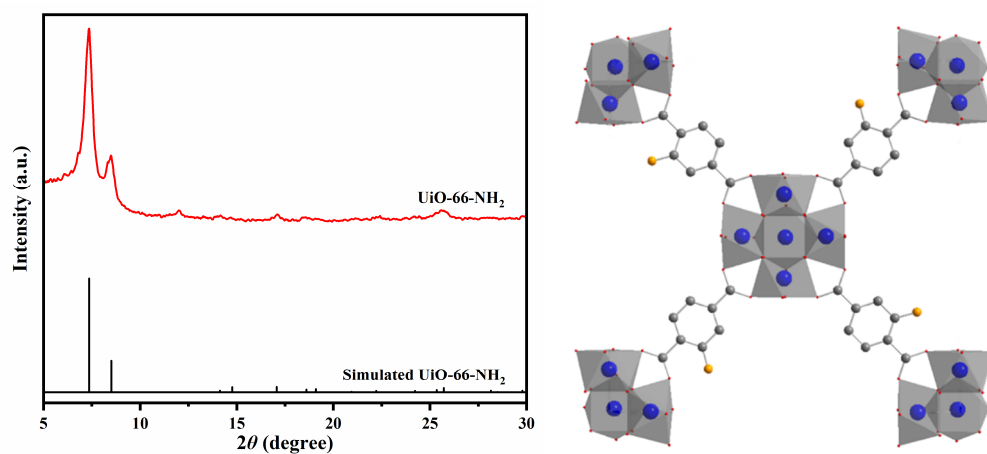

**Figure S2.** XRD patterns of simulated and synthesized UiO-66-NH<sub>2</sub>, and the crystal structure of UiO-66-NH<sub>2</sub>.



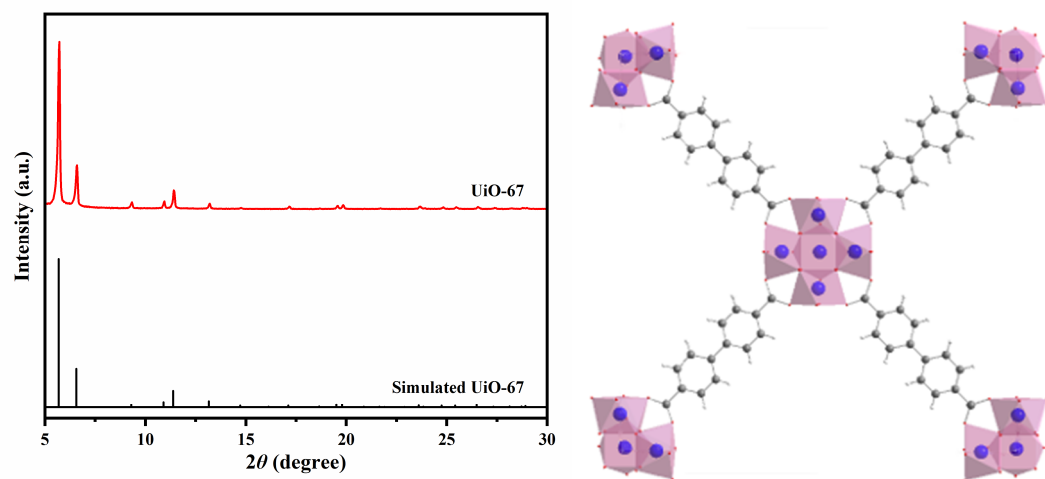

**Figure S3.** XRD patterns of simulated and synthesized UiO-67, and the crystal structure of UiO-67.

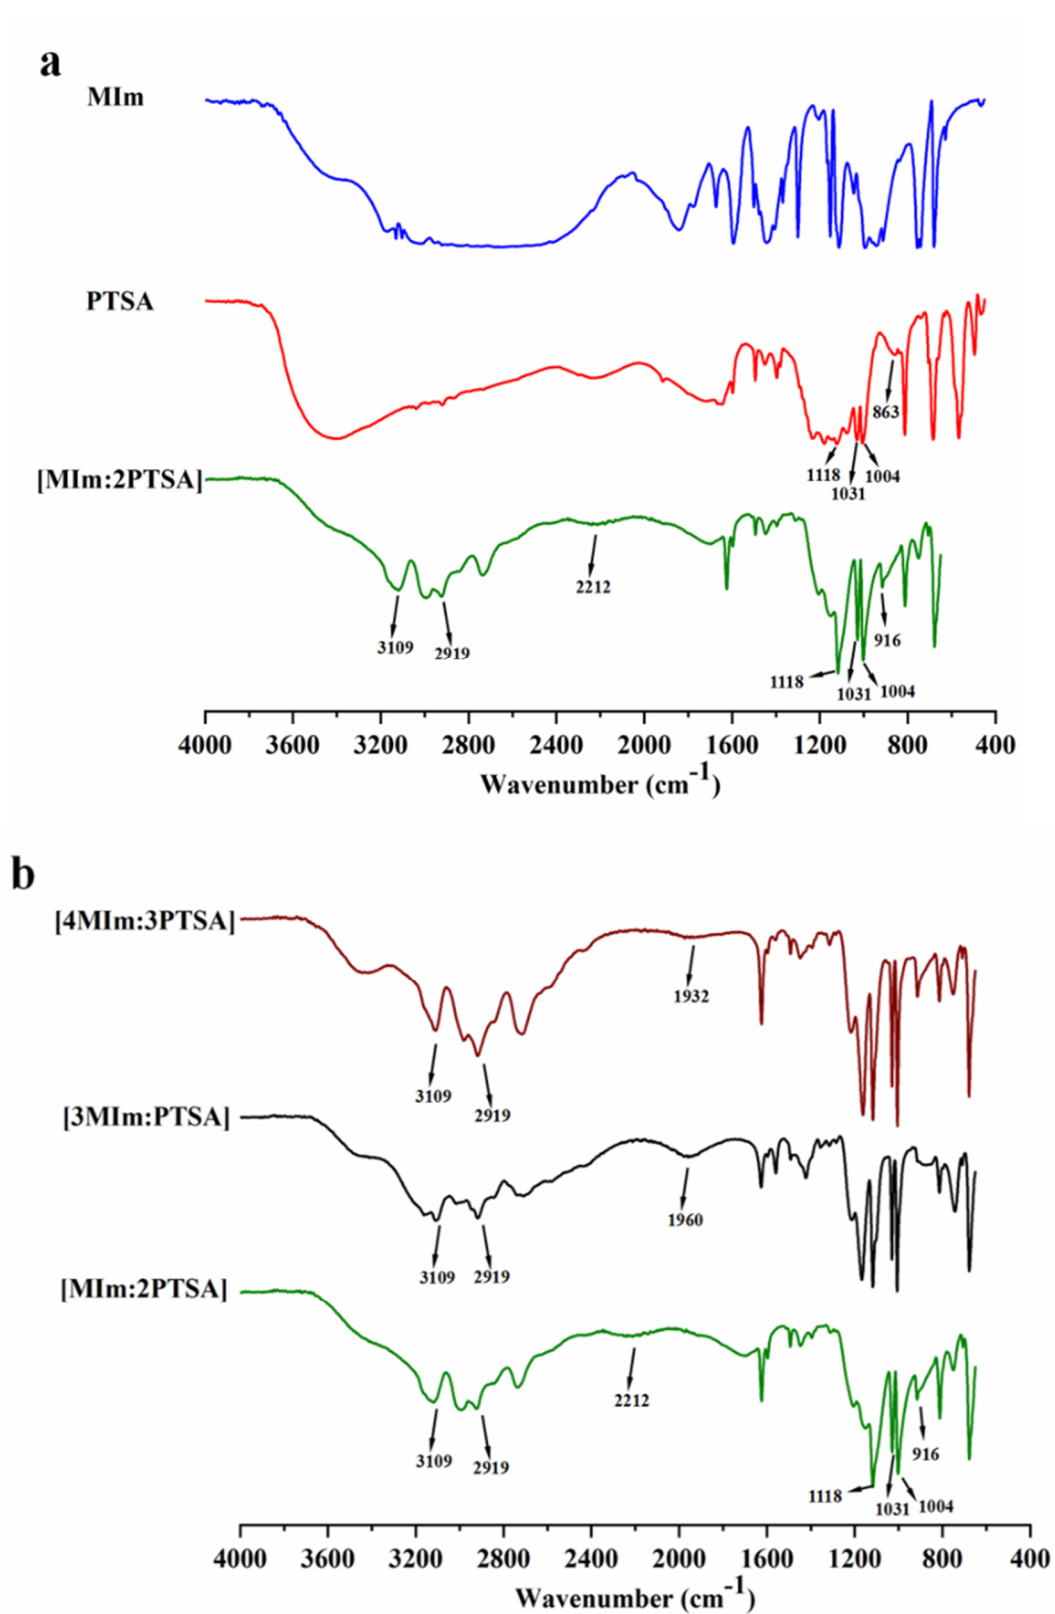

**Figure S4.** (a) FT-IR spectra of MIm, PTSA, and [MIm:2PTSA]; (b) FT-IR spectra of [4MIm:3PTSA], [3MIm:PTSA], and [MIm:2PTSA].

**Table S2.** The catalytic performance of UiO-66-DES in the acetalization of furfural and 5-hydroxymethylfurfural with methanol.

| entry | Reactant                | Time (h) | Conversion (%) |
|-------|-------------------------|----------|----------------|
| 1     | furfural                | 1        | 78.4           |
| 2     | 5-hydroxymethylfurfural | 1        | 93.1           |
